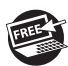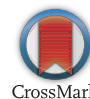

## Issues and Events

### Contact for information on ADA events:

American Diabetes Association  
1701 N. Beauregard St., Alexandria, VA 22311  
Tel: 800-232-3472, select option 1  
Fax: 703-549-1715 or 703-253-4358  
E-mail: [professionaleducation@diabetes.org](mailto:professionaleducation@diabetes.org)  
Web site: [professional.diabetes.org/ce](http://professional.diabetes.org/ce)

### ADA EVENTS

#### 75th Scientific Sessions

5–9 June 2015  
Boston Convention and Exhibition Center  
Boston, Massachusetts  
Web site: [scientificsessions.diabetes.org](http://scientificsessions.diabetes.org)

#### 2015 Diabetes Is Primary

6 June 2015  
Seaport Boston Hotel  
Boston, Massachusetts  
Web site: [professional.diabetes.org/primary](http://professional.diabetes.org/primary)

#### 2015 Hawaii Professional Symposium

29 August 2015  
Honolulu, Hawaii  
Web site: [professional.diabetes.org/Hawaii](http://professional.diabetes.org/Hawaii)

#### Diabetes and Endocrine Disorders for the Generalist and Specialist

26 September 2015  
Xavier University of Louisiana  
New Orleans, Louisiana  
Web site: [professional.diabetes.org/Louisiana](http://professional.diabetes.org/Louisiana)

### PATHWAY TO STOP DIABETES CALL FOR NOMINATIONS

The American Diabetes Association is pleased to announce that the Call for Nominations for the Pathway to Stop Diabetes Awards is now open. Pathway provides substantial support to exceptional scientists who are early in their diabetes research careers or who are established in other disciplines but are interested in applying their expertise to diabetes research. Applications are due 1 July 2015, for anticipated funding to start 1 January 2016. For more information, please visit <http://www.diabetes.org/pathway>.

### WEBCASTS FROM THE 62ND ANNUAL ADVANCED POSTGRADUATE COURSE

Free-of-charge webcasts from the 2015 Postgraduate Course reflect the latest information on the management of diabetes and its complications, with practical tips and proven strategies for improving patient care and translation of the latest diabetes research into clinical practice. For more information, please visit [http://professional.diabetes.org/presentations\\_details.aspx?session=4589](http://professional.diabetes.org/presentations_details.aspx?session=4589).

### DIABETES CORE UPDATE PODCASTS

*Diabetes Core Update* is a monthly audio podcast devoted to presenting and discussing the latest clinically relevant articles from the American Diabetes Association's scholarly journals. *Diabetes Core Update* audio podcasts are free and can be accessed through iTunes or RSS feed. For more information, please visit [diabetesjournals.org/site/podcasts.xhtml](http://diabetesjournals.org/site/podcasts.xhtml).
